# Supplementary material
Source: publisher figshare collection journal article supplement (https://geolsoc.figshare.com/ndownloader/files/21204705)
Supplement: Supplementary file 1 [file 21204705]

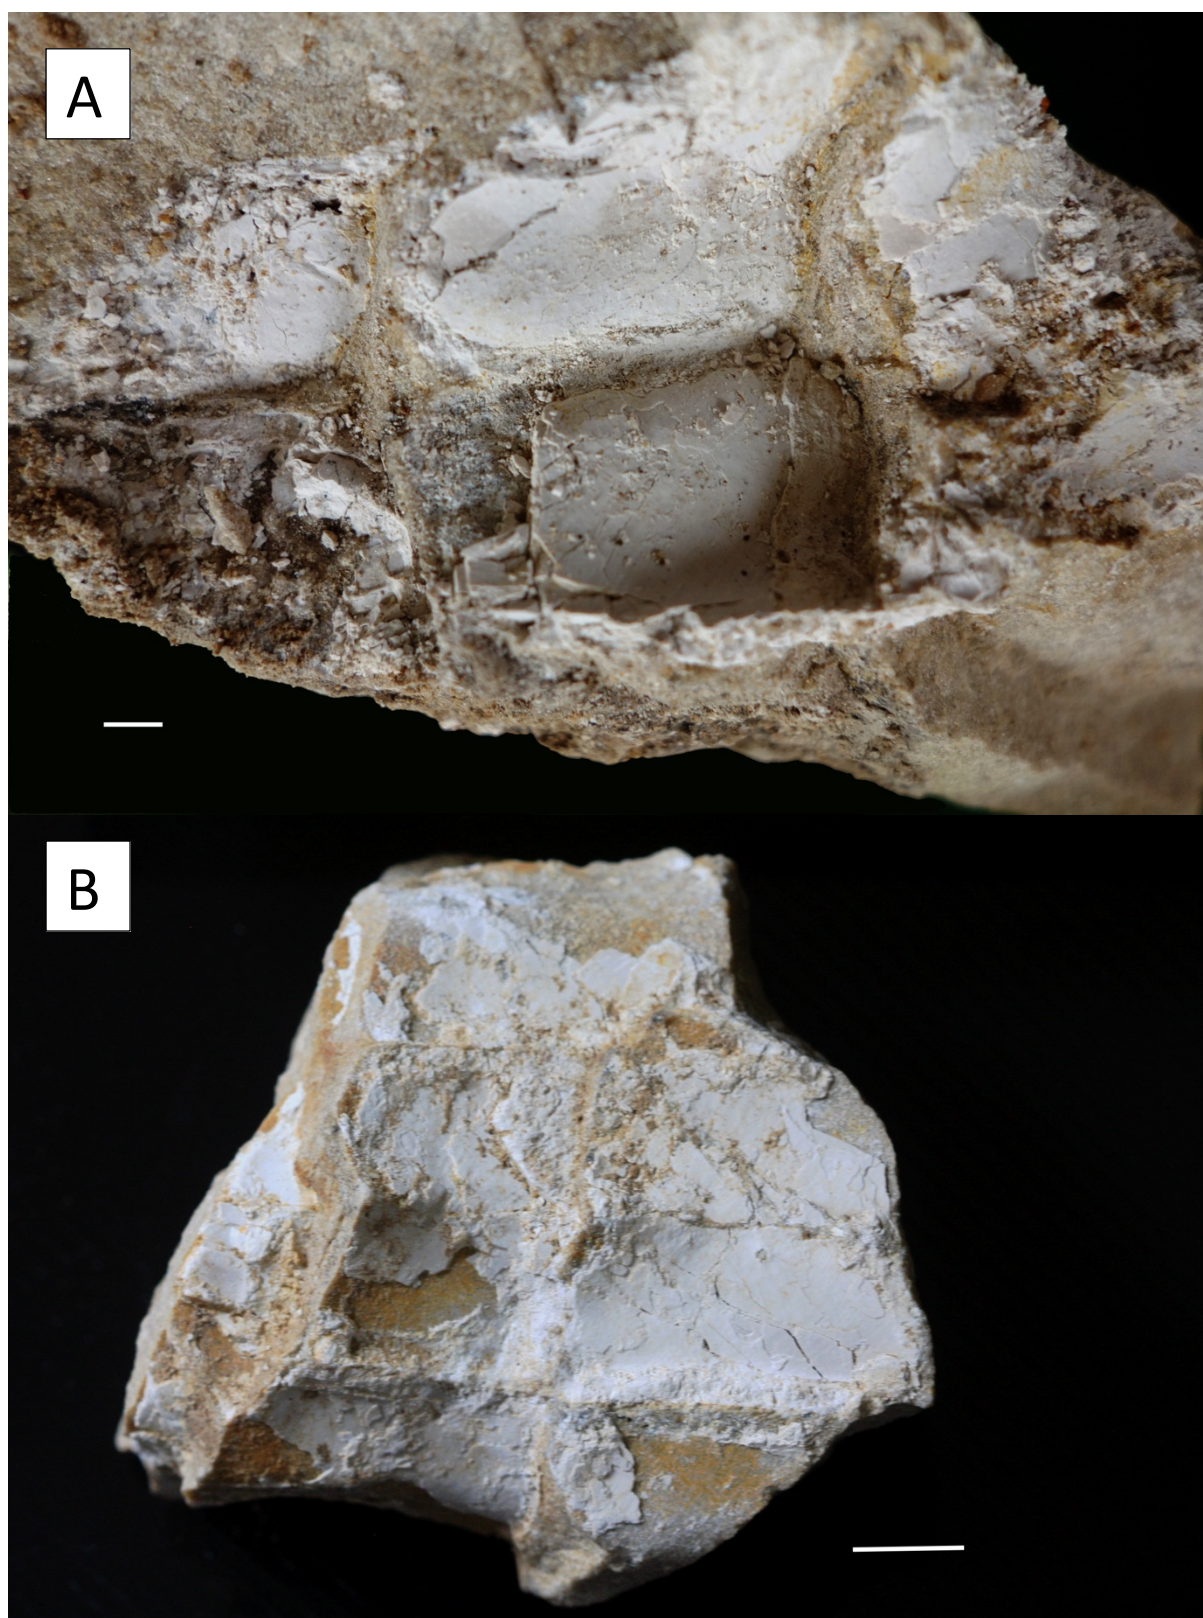

Figure S1. The two caudal specimens of *Stagonolepis robertsoni*, ELGNM 2018.6.1 (A) and ELGNM 2018.6.2 (B), showing internal impressions of the caudal osteoderms, in articulation. Scale bars = 10 mm.
